# Supplementary material
Source: PubMed Central journal article supplement (PMC10939109)
Supplement: NIHMS1970600-supplement-pce14281-sup-0001-supplementalmaterialsv_4-2.pdf [file NIHMS1970600-supplement-pce14281-sup-0001-supplementalmaterialsv_4-2.pdf]

## Supplemental Materials

**Title:** The carbon economics of vegetative phase change

**Authors:** Erica H. Lawrence, Clint J. Springer, Brent R. Helliker and R. Scott Poethig

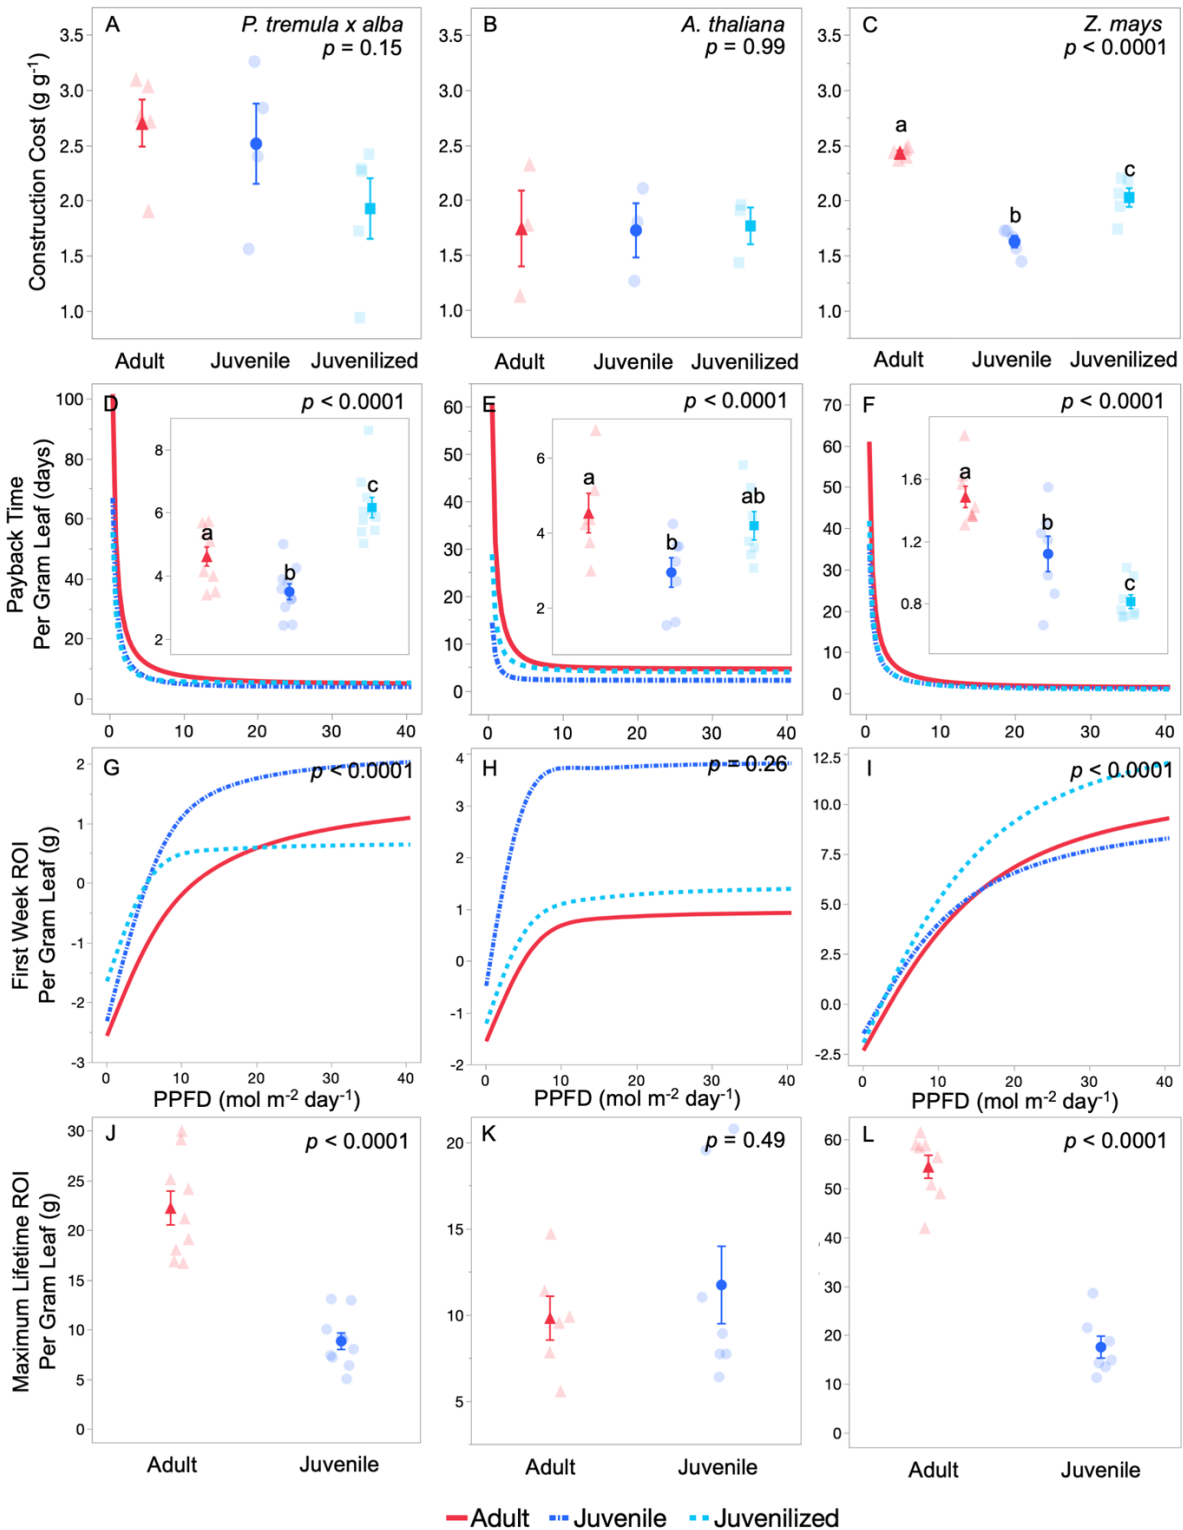

**Figure S1.** Payback time per gram of leaf tissue (A-C), and return on investment (ROI) per gram of leaf tissue in grams of glucose (D-F) for adult (red solid lines), juvenile (blue dash-dotted lines), and juvenilized (light blue dashed lines) leaves of *P. tremula x alba* (A, D), *A. thaliana* (B, E), and *Z. mays* (C, F). Payback time and ROI are modeled using photosynthetic light response parameters and 12-hour light periods with constant PAR levels between 10 and 2000  $\mu\text{mol m}^{-2} \text{s}^{-1}$  and are plotted against the resulting daily integrated photosynthetic photon flux density (PPFD). *P*-values determined by ANCOVA.

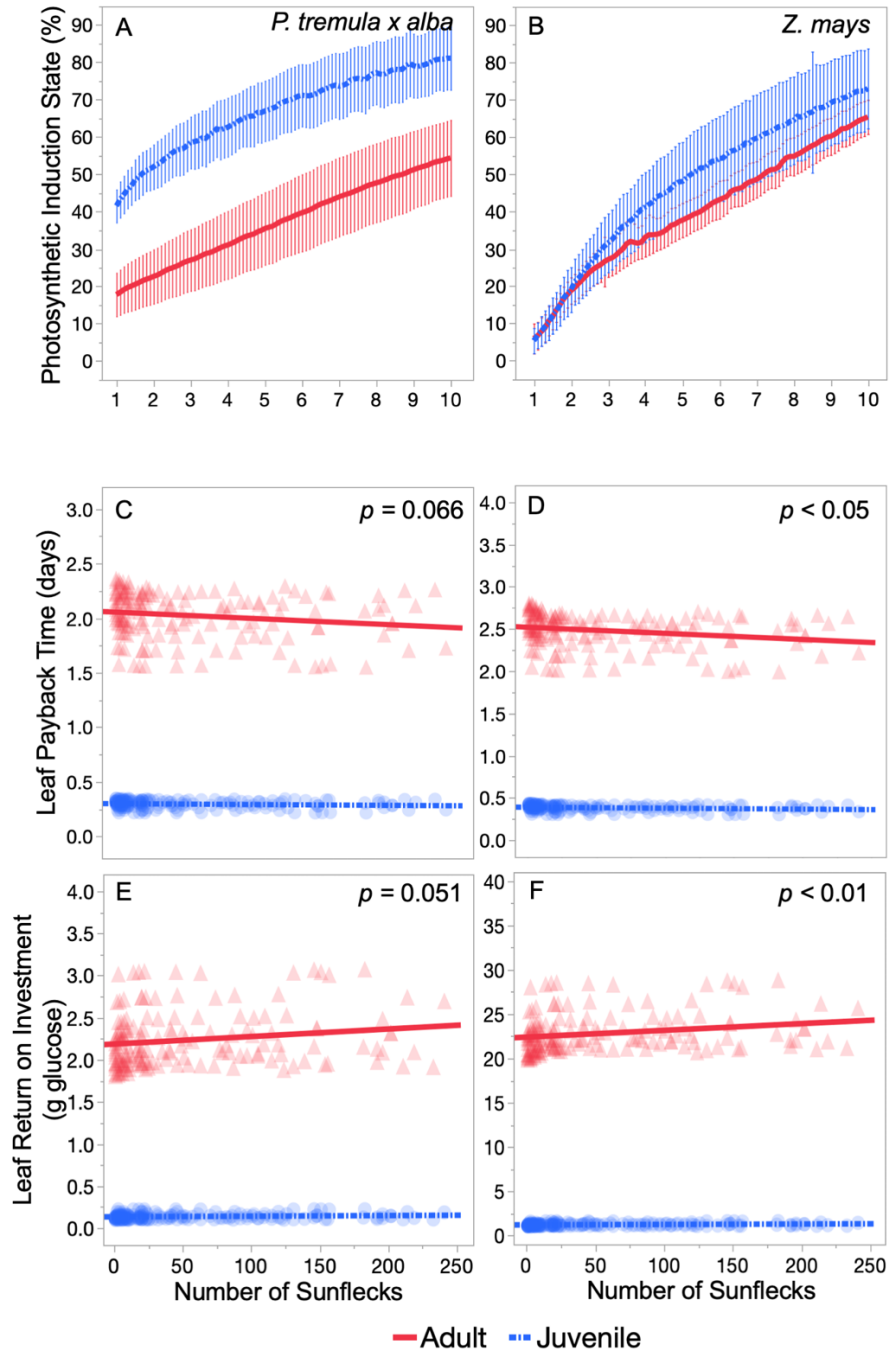

**Figure S3.** Photosynthetic induction state during minutes 1-10 of exposure to saturating light (A, B), leaf payback time (C, D) and leaf lifetime return on investment (E, F) for adult (solid, red) and juvenile (dash-dotted, blue) leaves of *P. tremula x alba* (A, C, E) and *Z. mays* (B, D, F) for adult (red triangles and solid lines) and juvenile (blue circles and dash-dotted lines). Payback time and ROI modeled from simulated dynamic light environments plotted against daily number of sunflecks. Photosynthetic induction data presented as the mean  $\pm$  s.e.m and payback time and ROI data presented as individual replicates by transparent symbols and linear line of best-fit. *P*-values determined by *ANCOVA*.

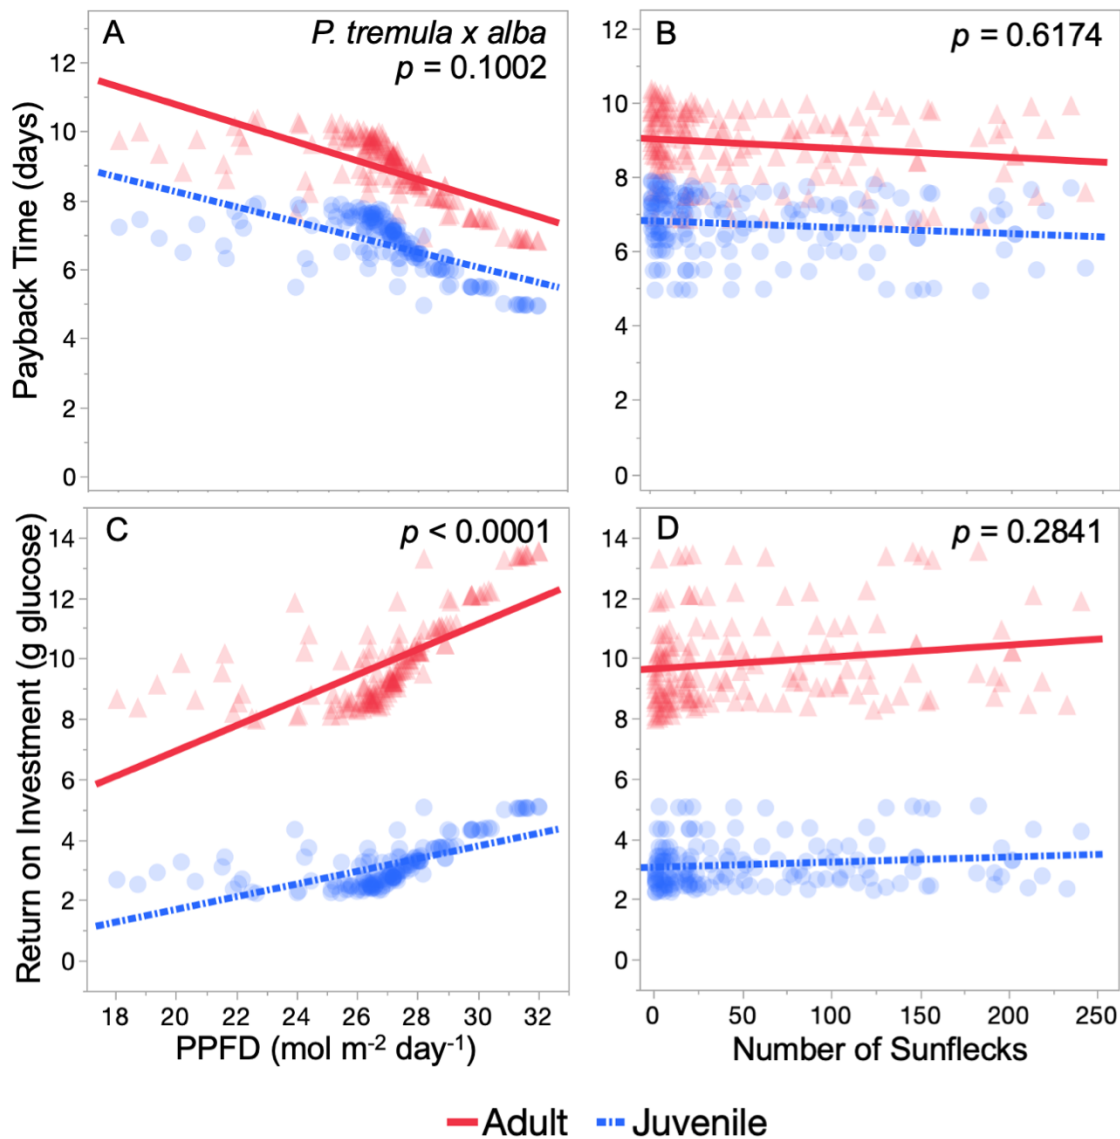

**Figure S4.** Payback time per gram of leaf tissue (A-B) and lifetime return on investment per gram of leaf tissue (C-D) for adult (red triangles and solid lines) and juvenile (blue circles and dash-dotted lines) leaves from simulated dynamic light environments in *P. tremula x alba* plotted against daily integrated PPFD (A, C) and number of sunflecks across the day (B, D). Data presented as individual replicates by transparent symbols and linear line of best-fit. *P*-values determined by ANCOVA.

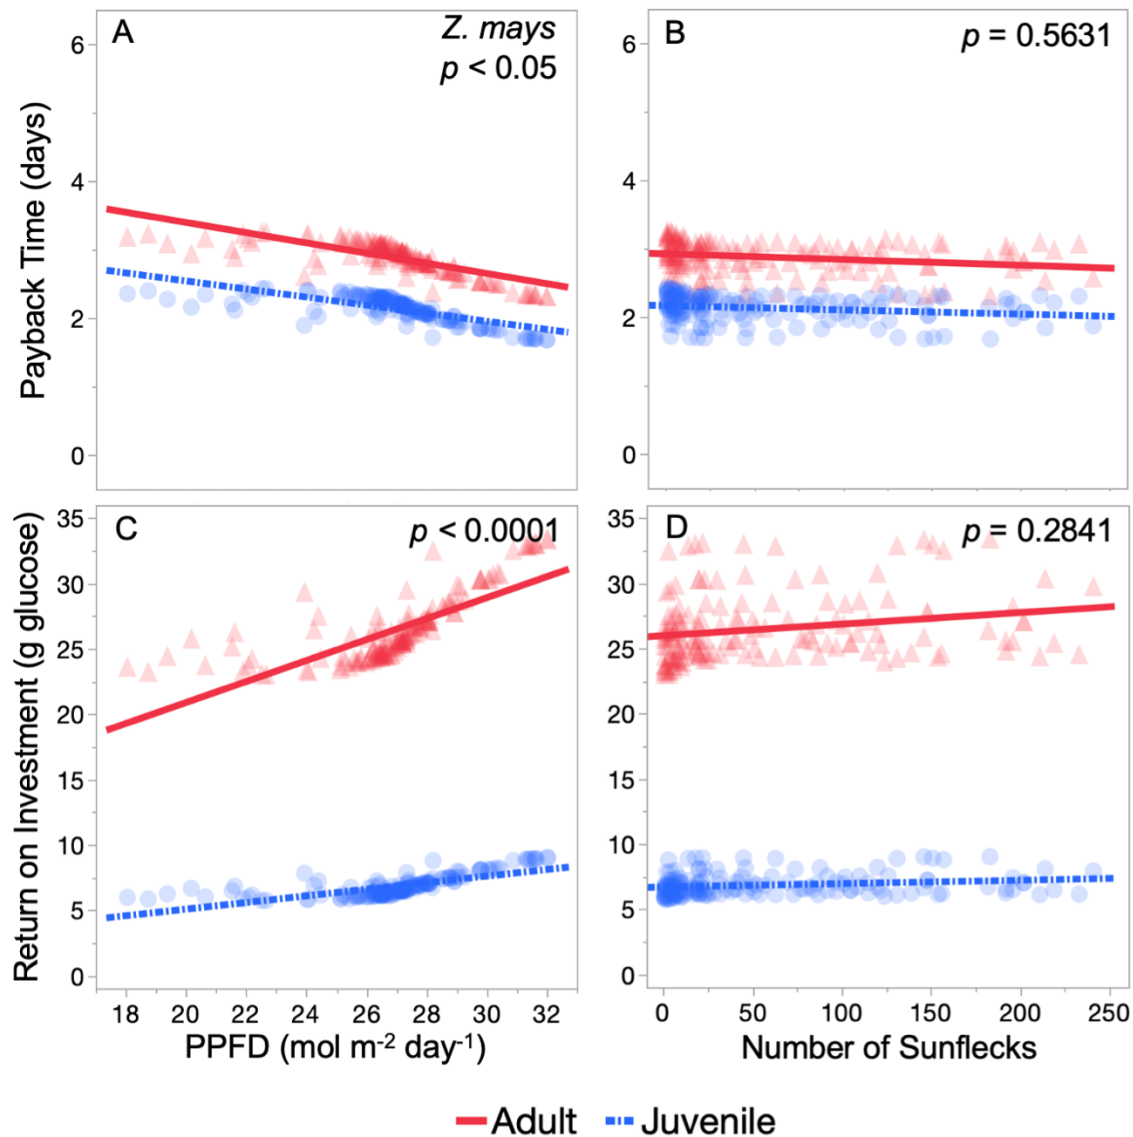

**Figure S5.** Payback time per gram of leaf tissue (A-B) and lifetime return on investment per gram of leaf tissue (C-D) for adult (red triangles and solid lines) and juvenile (blue circles and dash-dotted lines) leaves from simulated dynamic light environments in *Z. mays* plotted against daily integrated PPFD (A, C) and number of sunflecks across the day (B, D). Data presented as individual replicates by transparent symbols and linear line of best-fit. *P*-values determined by ANCOVA.

**Table S1.** Leaf morphological traits for adult, juvenile and juvenilized leaves of *P. tremula x alba*, *A. thaliana*, and *Z. mays*. Parameters presented as the median with interquartile range in parenthesis. Where one-way ANOVA showed significant differences ( $p < 0.05$ ), a Student's *t* test was performed to determine significant differences between developmental groups ( $p < 0.05$ ), shown by different lowercase letters. SLA = specific leaf area, LMA = leaf mass per area.

| Species                  | Development | Leaf Area<br>(cm <sup>2</sup> ) | Leaf Mass<br>(mg)            | SLA<br>(cm <sup>2</sup> g <sup>-1</sup> ) | LMA<br>(mg cm <sup>-2</sup> ) | n  |
|--------------------------|-------------|---------------------------------|------------------------------|-------------------------------------------|-------------------------------|----|
| <i>P. tremula x alba</i> | Adult       | 69.06 (12.65) <sup>a</sup>      | 226.85 (53.40) <sup>a</sup>  | 330.04 (103.66) <sup>c</sup>              | 3.04 (0.90) <sup>a</sup>      | 10 |
|                          | Juvenile    | 20.05 (14.49) <sup>c</sup>      | 43.81 (64.16) <sup>c</sup>   | 547.48 (94.41) <sup>a</sup>               | 1.83 (0.31) <sup>c</sup>      | 10 |
|                          | Juvenilized | 57.27 (11.16) <sup>b</sup>      | 119.34 (30.83) <sup>b</sup>  | 467.58 (63.04) <sup>b</sup>               | 2.14 (0.29) <sup>b</sup>      | 10 |
| <i>A. thaliana</i>       | Adult       | 1.32 (0.41) <sup>a</sup>        | 3.28 (1.66) <sup>a</sup>     | 432.99 (156.24) <sup>c</sup>              | 2.35 (0.95) <sup>a</sup>      | 6  |
|                          | Juvenile    | 0.88 (0.40) <sup>b</sup>        | 0.74 (0.39) <sup>b</sup>     | 1212.61 (522.06) <sup>a</sup>             | 0.82 (0.53) <sup>c</sup>      | 7  |
|                          | Juvenilized | 0.75 (0.27) <sup>b</sup>        | 1.21 (0.59) <sup>b</sup>     | 615.51 (144.35) <sup>b</sup>              | 1.62 (0.34) <sup>b</sup>      | 7  |
| <i>Z. mays</i>           | Adult       | 436.13 (56.28) <sup>a</sup>     | 861.95 (465.63) <sup>a</sup> | 476.50 (75.26) <sup>c</sup>               | 2.10 (0.31) <sup>a</sup>      | 8  |
|                          | Juvenile    | 95.18 (18.22) <sup>b</sup>      | 179.40 (46.63) <sup>b</sup>  | 516.61 (110.71) <sup>b</sup>              | 1.94 (0.38) <sup>b</sup>      | 7  |
|                          | Juvenilized | 65.89 (25.18) <sup>c</sup>      | 108.09 (73.00) <sup>c</sup>  | 710.73 (84.33) <sup>a</sup>               | 1.41 (0.16) <sup>c</sup>      | 8  |

**Table S2.** Light response curve parameters for adult, juvenile and juvenilized leaves of *P. tremula x alba*, *A. thaliana*, and *Z. mays*. Parameters are light saturated net photosynthetic rate ( $A_{sat}$ ), light use efficiency ( $\Phi$ ), dark respiration ( $R_d$ ), and curvature ( $\theta$ ). Parameters presented as the median with interquartile range in parenthesis. Where one-way ANOVA showed significant differences ( $p < 0.05$ ), a Student's *t* test was performed to determine significant differences between developmental groups ( $p < 0.05$ ), shown by different lowercase letters.

| Species                  | Development | $A_{sat}$<br>( $\mu\text{mol m}^{-2} \text{s}^{-1}$ ) | $\Phi$      | $R_d$<br>( $\mu\text{mol m}^{-2} \text{s}^{-1}$ ) | $\theta$                 | n  |
|--------------------------|-------------|-------------------------------------------------------|-------------|---------------------------------------------------|--------------------------|----|
| <i>P. tremula x alba</i> | Adult       | 15.72 (2.48) <sup>a</sup>                             | 0.07 (0.02) | 0.40 (0.20) <sup>b</sup>                          | 0.50 (0.18) <sup>b</sup> | 6  |
|                          | Juvenile    | 11.5 (3.42) <sup>b</sup>                              | 0.06 (0.06) | 0.94 (0.21) <sup>c</sup>                          | 0.79 (0.05) <sup>a</sup> | 5  |
|                          | Juvenilized | 6.02 (1.38) <sup>c</sup>                              | 0.05 (0.01) | 0.12 (0.18) <sup>a</sup>                          | 0.88 (0.19) <sup>a</sup> | 6  |
| <i>A. thaliana</i>       | Adult       | 7.47 (1.60) <sup>a</sup>                              | 0.05 (0.02) | 0.38 (0.33)                                       | 0.89 (0.04)              | 7  |
|                          | Juvenile    | 5.19 (2.69) <sup>b</sup>                              | 0.07 (0.07) | 0.83 (1.63)                                       | 0.89 (0.36)              | 7  |
|                          | Juvenilized | 5.86 (0.46) <sup>b</sup>                              | 0.08 (0.02) | 0.71 (1.28)                                       | 0.62 (0.28)              | 6  |
| <i>Z. mays</i>           | Adult       | 28.10 (2.90) <sup>ab</sup>                            | 0.06 (0.01) | 1.04 (0.44)                                       | 0.78 (0.12)              | 12 |
|                          | Juvenile    | 24.07 (5.81) <sup>b</sup>                             | 0.07 (0.01) | 0.84 (0.48)                                       | 0.65 (0.22)              | 15 |
|                          | Juvenilized | 30.70 (5.74) <sup>a</sup>                             | 0.07 (0.01) | 0.97 (0.65)                                       | 0.68 (0.10)              | 10 |

**Table S3.** Light induction parameters for adult and juvenile leaves of *P. tremula x alba* and *Z. mays*. Relaxation time for Rubisco activation (tau) determined from the slope of the linear relationship between  $\ln(Af^*-A^*)$  vs. time during minutes 1-10 of induction described in the table below. Data presented as the median with interquartile range in parenthesis. A student's *t* test was performed to determine significant differences between developmental groups ( $p < 0.05$ ), the intercept in *P. tremula x alba* was the only significantly different trait.

| Species                  | Development | tau<br>(min)  | slope              | intercept   | R <sup>2</sup> | n |
|--------------------------|-------------|---------------|--------------------|-------------|----------------|---|
| <i>P. tremula x alba</i> | Adult       | 11.40 (12.41) | -1.58e-3 (1.59e-3) | 2.61 (0.34) | 0.98 (0.04)    | 6 |
|                          | Juvenile    | 5.73 (0.32)   | -2.91e-3 (1.68e-4) | 1.88 (1.03) | 0.93 (0.24)    | 5 |
| <i>Z. mays</i>           | Adult       | 2.06 (1.32)   | -8.35e-3 (5.3e-3)  | 4.96 (0.22) | 0.83 (0.07)    | 4 |
|                          | Juvenile    | 2.08 (2.12)   | -8.41e-3 (5.77e-3) | 4.70 (0.35) | 0.88 (0.11)    | 4 |

**Table S4.** Linear relationships for carbon economic traits in simulated dynamic light environments depicted in figures 4, 5, S2, and S3 for adult and juvenile leaves of *P. tremula x alba* and *Z. mays*. *P*-values determined by ANCOVA.

| Species                  | Development  | dependent variable    | independent variable | slope    | intercept | R <sup>2</sup> | <i>P</i> -value |
|--------------------------|--------------|-----------------------|----------------------|----------|-----------|----------------|-----------------|
| <i>P. tremula x alba</i> | Adult        | Leaf payback time     | PPFD                 | -0.06    | 3.66      | 0.49           | <0.0001         |
|                          |              |                       | Sunflecks            | -5.7e-4  | 2.05      | 0.03           | <0.05           |
|                          | Juvenile     |                       | PPFD                 | -9.5e-3  | 0.55      | 0.41           | <0.0001         |
|                          |              |                       | Sunflecks            | -7.6e-5  | 0.3       | 0.02           | 0.0963          |
|                          | Adult        | Leaf ROI              | PPFD                 | 0.1      | -0.32     | 0.49           | <0.0001         |
|                          |              |                       | Sunflecks            | 8.9e-4   | 2.2       | 0.03           | <0.05           |
|                          | Juvenile     |                       | PPFD                 | 9.2e-3   | -0.11     | 0.43           | <0.0001         |
|                          |              |                       | Sunflecks            | 7.5e-5   | 0.14      | 0.02           | 0.0832          |
|                          | Adult        | Payback time per gram | PPFD                 | -0.27    | 16.12     | 0.49           | <0.0001         |
|                          |              |                       | Sunflecks            | -2.52e-3 | 9.02      | 0.02           | <0.05           |
|                          | Juvenile     |                       | PPFD                 | -0.22    | 12.57     | 0.41           | <0.0001         |
|                          |              |                       | Sunflecks            | -1.7e-3  | 6.82      | 0.02           | 0.0963          |
| Adult                    | ROI per gram | PPFD                  | 0.42                 | -1.41    | 0.49      | <0.0001        |                 |
|                          |              | Sunflecks             | 3.93e-3              | 9,7      | 0.03      | <0.05          |                 |
| Juvenile                 |              | PPFD                  | 0.21                 | -2.46    | 0.43      | <0.0001        |                 |
|                          |              | Sunflecks             | 1.7e-3               | 3.1      | 0.02      | 0.0832         |                 |
| <i>Z. mays</i>           | Adult        | Leaf payback time     | PPFD                 | -6.3e-2  | 4.17      | 0.6            | <0.0001         |
|                          |              |                       | Sunflecks            | -7.1e-4  | 2.5       | 0.05           | <0.01           |
|                          | Juvenile     |                       | PPFD                 | -0.01    | 0.66      | 0.56           | <0.0001         |
|                          |              |                       | Sunflecks            | -1.1e-4  | 0.39      | 0.04           | <0.01           |
|                          | Adult        | Leaf ROI              | PPFD                 | 0.69     | 4.37      | 0.58           | <0.0001         |
|                          |              |                       | Sunflecks            | 7.6e-3   | 22.6      | 0.05           | <0.01           |
|                          | Juvenile     |                       | PPFD                 | 0.05     | 0.01      | 0.55           | <0.0001         |
|                          |              |                       | Sunflecks            | 4.7e-4   | 1.21      | 0.04           | <0.05           |
|                          | Adult        | Payback time per gram | PPFD                 | -0.07    | 4.83      | 0.6            | <0.0001         |
|                          |              |                       | Sunflecks            | -8.2e-4  | 2.9       | 0.05           | <0.01           |
|                          | Juvenile     |                       | PPFD                 | -0.06    | 3.68      | 0.56           | <0.0001         |
|                          |              |                       | Sunflecks            | -6.1e-4  | 2.15      | 0.04           | <0.01           |
| Adult                    | ROI per gram | PPFD                  | 0.8                  | 5.07     | 0.58      | <0.0001        |                 |
|                          |              | Sunflecks             | 8.9e-3               | 26.22    | 0.05      | <0.01          |                 |
| Juvenile                 |              | PPFD                  | 0.25                 | 0.08     | 0.55      | <0.0001        |                 |
|                          |              | Sunflecks             | 2.6e-3               | 6.75     | 0.04      | <0.05          |                 |



**Table S5.** Inputs for each dynamic light simulation and the daily integrated PPFD and number of sunflecks resulting for that simulation.

| Inputs     |     |                         |     |          |     |                | Outputs               |                |
|------------|-----|-------------------------|-----|----------|-----|----------------|-----------------------|----------------|
| Simulation | LAI | Initial Sunfleck Length | day | latitude | off | random # range | Daily integrated PPFD | # of sunflecks |
| S1         | 2   | 0.001                   | 180 | 0.697    | 6   | 0.8-1.2        | 25.49                 | 6              |
| S2         | 2   | 0.002                   | 180 | 0.697    | 6   | 0.8-1.2        | 20.18                 | 3              |
| S3         | 2   | 0.0009                  | 180 | 0.697    | 6   | 0.8-1.2        | 26.21                 | 6              |
| S4         | 2   | 0.0008                  | 180 | 0.697    | 6   | 0.8-1.2        | 26.40                 | 7              |
| S5         | 2   | 0.0006                  | 180 | 0.697    | 6   | 0.8-1.2        | 26.84                 | 8              |
| S6         | 2   | 0.0004                  | 180 | 0.697    | 6   | 0.8-1.2        | 27.10                 | 11             |
| S7         | 2   | 0.0002                  | 180 | 0.697    | 6   | 0.8-1.2        | 27.82                 | 20             |
| S8         | 2   | 0.00009                 | 180 | 0.697    | 6   | 0.8-1.2        | 28.04                 | 43             |
| S9         | 2   | 0.00007                 | 180 | 0.697    | 6   | 0.8-1.2        | 27.99                 | 51             |
| S10        | 2   | 0.00005                 | 180 | 0.697    | 6   | 0.8-1.2        | 28.08                 | 71             |
| S11        | 2   | 0.00003                 | 180 | 0.697    | 6   | 0.8-1.2        | 27.99                 | 116            |
| S12        | 2.2 | 0.00003                 | 180 | 0.697    | 6   | 0.8-1.2        | 27.62                 | 53             |
| S13        | 2.2 | 0.00005                 | 180 | 0.697    | 6   | 0.8-1.2        | 27.71                 | 33             |
| S14        | 2.2 | 0.00009                 | 180 | 0.697    | 6   | 0.8-1.2        | 27.77                 | 21             |
| S15        | 2.2 | 0.0004                  | 180 | 0.697    | 6   | 0.8-1.2        | 26.08                 | 6              |
| S16        | 2.2 | 0.0008                  | 180 | 0.697    | 6   | 0.8-1.2        | 21.53                 | 3              |
| S17        | 2.2 | 0.002                   | 180 | 0.697    | 6   | 0.8-1.2        | 27.53                 | 2              |
| S18        | 2.5 | 0.002                   | 180 | 0.697    | 6   | 0.8-1.2        | 27.53                 | 1              |
| S19        | 2.5 | 0.0004                  | 180 | 0.697    | 6   | 0.8-1.2        | 19.38                 | 2              |
| S20        | 2.5 | 0.00005                 | 180 | 0.697    | 6   | 0.8-1.2        | 26.66                 | 11             |
| S21        | 2.5 | 0.00003                 | 180 | 0.697    | 6   | 0.8-1.2        | 27.33                 | 19             |
| S22        | 2.5 | 0.00001                 | 180 | 0.697    | 6   | 0.8-1.2        | 27.33                 | 50             |
| S23        | 2.5 | 0.000008                | 180 | 0.697    | 6   | 0.8-1.2        | 27.81                 | 58             |
| S24        | 2.5 | 0.000006                | 180 | 0.697    | 6   | 0.8-1.2        | 27.41                 | 83             |
| S25        | 2.5 | 0.000004                | 180 | 0.697    | 6   | 0.8-1.2        | 27.48                 | 121            |
| S26        | 2.8 | 0.000004                | 180 | 0.697    | 6   | 0.8-1.2        | 26.99                 | 41             |
| S27        | 2.8 | 0.000002                | 180 | 0.697    | 6   | 0.8-1.2        | 27.35                 | 78             |
| S28        | 2.8 | 0.0000008               | 180 | 0.697    | 6   | 0.8-1.2        | 27.03                 | 220            |
| S29        | 2.8 | 0.000006                | 180 | 0.697    | 6   | 0.8-1.2        | 27.06                 | 25             |
| S30        | 2.8 | 0.000008                | 180 | 0.697    | 6   | 0.8-1.2        | 27.09                 | 21             |
| S31        | 2.8 | 0.00001                 | 180 | 0.697    | 6   | 0.8-1.2        | 27.13                 | 18             |
| S32        | 2.8 | 0.0008                  | 180 | 0.697    | 6   | 0.8-1.2        | 27.30                 | 1              |
| S33        | 3   | 0.00001                 | 180 | 0.697    | 6   | 0.8-1.2        | 26.20                 | 9              |

|     |     |            |     |       |   |         |       |     |
|-----|-----|------------|-----|-------|---|---------|-------|-----|
| S34 | 3   | 0.0008     | 180 | 0.697 | 6 | 0.8-1.2 | 27.18 | 1   |
| S35 | 3   | 0.00003    | 180 | 0.697 | 6 | 0.8-1.2 | 22.20 | 4   |
| S36 | 3   | 0.00005    | 180 | 0.697 | 6 | 0.8-1.2 | 18.05 | 2   |
| S37 | 3   | 0.000008   | 180 | 0.697 | 6 | 0.8-1.2 | 26.26 | 10  |
| S38 | 3   | 0.000006   | 180 | 0.697 | 6 | 0.8-1.2 | 26.55 | 13  |
| S39 | 3   | 0.000004   | 180 | 0.697 | 6 | 0.8-1.2 | 27.22 | 20  |
| S40 | 3   | 0.000002   | 180 | 0.697 | 6 | 0.8-1.2 | 27.20 | 36  |
| S41 | 3   | 0.0000008  | 180 | 0.697 | 6 | 0.8-1.2 | 27.21 | 85  |
| S42 | 3.2 | 0.0000008  | 180 | 0.697 | 6 | 0.8-1.2 | 27.31 | 42  |
| S43 | 3.2 | 0.0000006  | 180 | 0.697 | 6 | 0.8-1.2 | 26.65 | 52  |
| S44 | 3.2 | 0.0000004  | 180 | 0.697 | 6 | 0.8-1.2 | 27.20 | 80  |
| S45 | 3.2 | 0.0000002  | 180 | 0.697 | 6 | 0.8-1.2 | 28.19 | 183 |
| S46 | 3.2 | 0.000002   | 180 | 0.697 | 6 | 0.8-1.2 | 26.81 | 19  |
| S47 | 3.2 | 0.000004   | 180 | 0.697 | 6 | 0.8-1.2 | 26.23 | 10  |
| S48 | 3.2 | 0.000008   | 180 | 0.697 | 6 | 0.8-1.2 | 25.21 | 6   |
| S49 | 3.2 | 0.00001    | 180 | 0.697 | 6 | 0.8-1.2 | 24.48 | 5   |
| S50 | 3.2 | 0.00003    | 180 | 0.697 | 6 | 0.8-1.2 | 20.64 | 2   |
| S51 | 3.5 | 0.00003    | 180 | 0.697 | 6 | 0.8-1.2 | 26.94 | 2   |
| S52 | 3.5 | 0.00001    | 180 | 0.697 | 6 | 0.8-1.2 | 22.07 | 2   |
| S53 | 3.5 | 0.000008   | 180 | 0.697 | 6 | 0.8-1.2 | 18.74 | 2   |
| S54 | 3.5 | 0.000002   | 180 | 0.697 | 6 | 0.8-1.2 | 25.60 | 7   |
| S55 | 3.5 | 0.0000008  | 180 | 0.697 | 6 | 0.8-1.2 | 26.35 | 14  |
| S56 | 3.5 | 0.0000006  | 180 | 0.697 | 6 | 0.8-1.2 | 26.56 | 19  |
| S57 | 3.5 | 0.0000004  | 180 | 0.697 | 6 | 0.8-1.2 | 26.42 | 24  |
| S58 | 3.5 | 0.0000001  | 180 | 0.697 | 6 | 0.8-1.2 | 27.18 | 93  |
| S59 | 3.8 | 0.0000001  | 180 | 0.697 | 6 | 0.8-1.2 | 26.42 | 29  |
| S60 | 3.8 | 0.00000008 | 180 | 0.697 | 6 | 0.8-1.2 | 27.04 | 39  |
| S61 | 3.8 | 0.00000005 | 180 | 0.697 | 6 | 0.8-1.2 | 26.10 | 55  |
| S62 | 3.8 | 0.00000002 | 180 | 0.697 | 6 | 0.8-1.2 | 26.46 | 155 |
| S63 | 3.8 | 0.0000003  | 180 | 0.697 | 6 | 0.8-1.2 | 25.81 | 11  |
| S64 | 3.8 | 0.0000005  | 180 | 0.697 | 6 | 0.8-1.2 | 25.71 | 8   |
| S65 | 1.8 | 0.001      | 180 | 0.697 | 6 | 0.8-1.2 | 27.36 | 10  |
| S66 | 1.8 | 0.002      | 180 | 0.697 | 6 | 0.8-1.2 | 26.44 | 6   |
| S67 | 1.8 | 0.003      | 180 | 0.697 | 6 | 0.8-1.2 | 24.26 | 4   |
| S68 | 1.8 | 0.004      | 180 | 0.697 | 6 | 0.8-1.2 | 21.62 | 3   |
| S69 | 1.8 | 0.0008     | 180 | 0.697 | 6 | 0.8-1.2 | 27.41 | 11  |
| S70 | 1.8 | 0.0006     | 180 | 0.697 | 6 | 0.8-1.2 | 28.12 | 15  |
| S71 | 1.8 | 0.0004     | 180 | 0.697 | 6 | 0.8-1.2 | 27.92 | 22  |
| S72 | 1.8 | 0.0002     | 180 | 0.697 | 6 | 0.8-1.2 | 28.05 | 42  |
| S73 | 1.8 | 0.00008    | 180 | 0.697 | 6 | 0.8-1.2 | 27.89 | 98  |

|      |     |          |     |       |   |         |       |     |
|------|-----|----------|-----|-------|---|---------|-------|-----|
| S74  | 1.5 | 0.0008   | 180 | 0.697 | 6 | 0.8-1.2 | 28.53 | 33  |
| S75  | 1.5 | 0.0006   | 180 | 0.697 | 6 | 0.8-1.2 | 28.72 | 45  |
| S76  | 1.5 | 0.0004   | 180 | 0.697 | 6 | 0.8-1.2 | 28.80 | 62  |
| S77  | 1.5 | 0.0002   | 180 | 0.697 | 6 | 0.8-1.2 | 29.29 | 127 |
| S78  | 1.5 | 0.001    | 180 | 0.697 | 6 | 0.8-1.2 | 28.72 | 25  |
| S79  | 1.5 | 0.003    | 180 | 0.697 | 6 | 0.8-1.2 | 28.19 | 10  |
| S80  | 1.5 | 0.005    | 180 | 0.697 | 6 | 0.8-1.2 | 27.41 | 8   |
| S81  | 1.5 | 0.007    | 180 | 0.697 | 6 | 0.8-1.2 | 26.35 | 6   |
| S82  | 1.5 | 0.01     | 180 | 0.697 | 6 | 0.8-1.2 | 24.40 | 4   |
| S83  | 1   | 0.01     | 180 | 0.697 | 6 | 0.8-1.2 | 29.80 | 21  |
| S84  | 1   | 0.008    | 180 | 0.697 | 6 | 0.8-1.2 | 29.80 | 24  |
| S85  | 1   | 0.006    | 180 | 0.697 | 6 | 0.8-1.2 | 29.76 | 31  |
| S86  | 1   | 0.004    | 180 | 0.697 | 6 | 0.8-1.2 | 30.21 | 47  |
| S87  | 1   | 0.002    | 180 | 0.697 | 6 | 0.8-1.2 | 30.44 | 89  |
| S88  | 1   | 0.0009   | 180 | 0.697 | 6 | 0.8-1.2 | 29.11 | 242 |
| S89  | 1   | 0.01     | 180 | 0.697 | 6 | 0.8-1.2 | 29.80 | 21  |
| S90  | 1   | 0.03     | 180 | 0.697 | 6 | 0.8-1.2 | 29.01 | 8   |
| S91  | 1   | 0.05     | 180 | 0.697 | 6 | 0.8-1.2 | 27.34 | 5   |
| S92  | 1   | 0.08     | 180 | 0.697 | 6 | 0.8-1.2 | 23.94 | 3   |
| S93  | 0.5 | 0.08     | 180 | 0.697 | 6 | 0.8-1.2 | 31.49 | 19  |
| S94  | 0.5 | 0.06     | 180 | 0.697 | 6 | 0.8-1.2 | 31.62 | 23  |
| S95  | 0.5 | 0.03     | 180 | 0.697 | 6 | 0.8-1.2 | 31.60 | 46  |
| S96  | 0.5 | 0.009    | 180 | 0.697 | 6 | 0.8-1.2 | 30.88 | 158 |
| S97  | 0.5 | 0.1      | 180 | 0.697 | 6 | 0.8-1.2 | 31.35 | 15  |
| S98  | 0.5 | 0.4      | 180 | 0.697 | 6 | 0.8-1.2 | 28.22 | 4   |
| S103 | 2   | 0.00002  | 180 | 0.697 | 6 | 0.8-1.2 | 28.10 | 203 |
| S104 | 2   | 0.000025 | 180 | 0.697 | 6 | 0.8-1.2 | 28.92 | 149 |
| S105 | 2   | 0.000035 | 180 | 0.697 | 6 | 0.8-1.2 | 27.81 | 102 |
| S106 | 2   | 0.00004  | 180 | 0.697 | 6 | 0.8-1.2 | 27.65 | 87  |
| S107 | 1.5 | 0.00015  | 180 | 0.697 | 6 | 0.8-1.2 | 28.56 | 197 |
| S108 | 1.5 | 0.00025  | 180 | 0.697 | 6 | 0.8-1.2 | 28.83 | 103 |
| S109 | 1.5 | 0.00027  | 180 | 0.697 | 6 | 0.8-1.2 | 28.97 | 93  |
| S110 | 1.5 | 0.00023  | 180 | 0.697 | 6 | 0.8-1.2 | 29.09 | 111 |
| S111 | 1   | 0.001    | 180 | 0.697 | 6 | 0.8-1.2 | 30.10 | 215 |
| S112 | 1   | 0.0015   | 180 | 0.697 | 6 | 0.8-1.2 | 30.36 | 121 |
| S113 | 1   | 0.0025   | 180 | 0.697 | 6 | 0.8-1.2 | 30.05 | 75  |
| S114 | 0.5 | 0.0085   | 180 | 0.697 | 6 | 0.8-1.2 | 32.01 | 184 |
| S115 | 0.5 | 0.0092   | 180 | 0.697 | 6 | 0.8-1.2 | 31.67 | 152 |
| S116 | 0.5 | 0.0094   | 180 | 0.697 | 6 | 0.8-1.2 | 32.03 | 147 |
| S117 | 0.5 | 0.01     | 180 | 0.697 | 6 | 0.8-1.2 | 31.30 | 132 |

|      |     |            |     |       |   |         |       |     |
|------|-----|------------|-----|-------|---|---------|-------|-----|
| S118 | 0.5 | 0.02       | 180 | 0.697 | 6 | 0.8-1.2 | 31.41 | 64  |
| S119 | 2   | 0.00002    | 180 | 0.697 | 6 | 0.8-1.2 | 28.10 | 203 |
| S120 | 2   | 0.000025   | 180 | 0.697 | 6 | 0.8-1.2 | 28.92 | 149 |
| S121 | 2.5 | 0.000003   | 180 | 0.697 | 6 | 0.8-1.2 | 27.10 | 193 |
| S122 | 2.5 | 0.0000035  | 180 | 0.697 | 6 | 0.8-1.2 | 27.24 | 147 |
| S123 | 2.5 | 0.0000045  | 180 | 0.697 | 6 | 0.8-1.2 | 27.65 | 110 |
| S124 | 3   | 0.0000007  | 180 | 0.697 | 6 | 0.8-1.2 | 26.76 | 98  |
| S125 | 3   | 0.00000065 | 180 | 0.697 | 6 | 0.8-1.2 | 27.21 | 106 |
| S126 | 3   | 0.00000055 | 180 | 0.697 | 6 | 0.8-1.2 | 26.99 | 123 |
| S127 | 3   | 0.0000004  | 180 | 0.697 | 6 | 0.8-1.2 | 27.19 | 197 |
| S128 | 3.5 | 0.00000009 | 180 | 0.697 | 6 | 0.8-1.2 | 27.34 | 106 |
| S129 | 3.5 | 0.00000008 | 180 | 0.697 | 6 | 0.8-1.2 | 26.53 | 116 |
| S130 | 3.5 | 0.00000007 | 180 | 0.697 | 6 | 0.8-1.2 | 26.61 | 140 |
| S131 | 4   | 0.00000007 | 180 | 0.697 | 6 | 0.8-1.2 | 26.45 | 21  |
| S132 | 4   | 0.00000009 | 180 | 0.697 | 6 | 0.8-1.2 | 26.31 | 18  |
| S133 | 4   | 0.0000002  | 180 | 0.697 | 6 | 0.8-1.2 | 25.82 | 9   |
| S134 | 4   | 0.0000003  | 180 | 0.697 | 6 | 0.8-1.2 | 25.30 | 7   |
| S135 | 4   | 0.00000007 | 180 | 0.697 | 6 | 0.8-1.2 | 26.60 | 21  |
| S136 | 4   | 0.00000005 | 180 | 0.697 | 6 | 0.8-1.2 | 26.49 | 26  |
| S137 | 4   | 0.00000002 | 180 | 0.697 | 6 | 0.8-1.2 | 26.25 | 64  |
| S138 | 4   | 8E-09      | 180 | 0.697 | 6 | 0.8-1.2 | 26.94 | 193 |
| S139 | 4   | 9E-09      | 180 | 0.697 | 6 | 0.8-1.2 | 26.84 | 157 |
| S140 | 4   | 0.00000001 | 180 | 0.697 | 6 | 0.8-1.2 | 26.33 | 132 |
| S141 | 4.5 | 0.00000001 | 180 | 0.697 | 6 | 0.8-1.2 | 26.53 | 21  |
| S142 | 4.5 | 0.00000004 | 180 | 0.697 | 6 | 0.8-1.2 | 25.15 | 7   |
| S143 | 4.5 | 0.00000008 | 180 | 0.697 | 6 | 0.8-1.2 | 21.90 | 4   |
| S144 | 4.5 | 7E-09      | 180 | 0.697 | 6 | 0.8-1.2 | 26.06 | 26  |
| S145 | 4.5 | 4E-09      | 180 | 0.697 | 6 | 0.8-1.2 | 26.58 | 47  |
| S146 | 4.5 | 1E-09      | 180 | 0.697 | 6 | 0.8-1.2 | 26.50 | 212 |
| S147 | 4.5 | 2.5E-09    | 180 | 0.697 | 6 | 0.8-1.2 | 26.65 | 74  |
| S148 | 5   | 2.5E-09    | 180 | 0.697 | 6 | 0.8-1.2 | 25.64 | 12  |
| S149 | 5   | 3E-09      | 180 | 0.697 | 6 | 0.8-1.2 | 25.73 | 10  |
| S150 | 5   | 8E-09      | 180 | 0.697 | 6 | 0.8-1.2 | 24.08 | 5   |
| S151 | 5   | 8E-10      | 180 | 0.697 | 6 | 0.8-1.2 | 26.48 | 33  |
| S152 | 5   | 2E-10      | 180 | 0.697 | 6 | 0.8-1.2 | 26.00 | 125 |
| S153 | 6   | 2E-10      | 180 | 0.697 | 6 | 0.8-1.2 | 22.52 | 4   |
| S154 | 6   | 2E-11      | 180 | 0.697 | 6 | 0.8-1.2 | 26.21 | 24  |
| S155 | 7   | 2E-12      | 180 | 0.697 | 6 | 0.8-1.2 | 25.14 | 7   |
| S156 | 8   | 2E-13      | 180 | 0.697 | 6 | 0.8-1.2 | 22.67 | 2   |
| S157 | 8   | 2E-14      | 180 | 0.697 | 6 | 0.8-1.2 | 25.44 | 11  |

|      |   |         |     |       |   |         |       |     |
|------|---|---------|-----|-------|---|---------|-------|-----|
| S158 | 8 | 2E-15   | 180 | 0.697 | 6 | 0.8-1.2 | 26.71 | 88  |
| S159 | 8 | 9E-16   | 180 | 0.697 | 6 | 0.8-1.2 | 26.82 | 234 |
| S160 | 8 | 2.1E-13 | 180 | 0.697 | 6 | 0.8-1.2 | 24.02 | 2   |
